# Supplementary material
Source: PubMed Central journal article supplement (PMC3655525)
Supplement: NIHMS461551-supplement-supp_data.pdf [file NIHMS461551-supplement-supp_data.pdf]

**Supp. Table S1. DNA sequence homology and sizes of the directly-oriented paralogous subunits larger than 5 kb in size and greater than 95% sequence identity between the proximal and distal LCR10q11.2 clusters shown in Figure 3 (hg18)**

| Chr10             | 51415937-51445085 | 51476922-51577155 | 50857418-51000438 | 51132409-51157544 | 51268550-51275550 | 50723592-50778669 | 51118853-51157544 | 50892936-50932354 | 50881562-50932351 | 51132409-51157544 | 51121126-51132409 | 51413982-51451492 | 51506346-51671002 | 50857418-50875895 | 51118853-51157544 | 50892936-50932354 | 50881562-50932354 | 51132413-51157544 |                 |
|-------------------|-------------------|-------------------|-------------------|-------------------|-------------------|-------------------|-------------------|-------------------|-------------------|-------------------|-------------------|-------------------|-------------------|-------------------|-------------------|-------------------|-------------------|-------------------|-----------------|
| 45491751-45520834 | 98.18%<br>29 kb   |                   |                   |                   |                   |                   |                   |                   |                   |                   |                   |                   |                   |                   |                   |                   |                   |                   |                 |
| 45520839-45622267 |                   | 98.59%<br>100 kb  |                   |                   |                   |                   |                   |                   |                   |                   |                   |                   |                   |                   |                   |                   |                   |                   |                 |
| 45603797-45746970 |                   |                   | 99.86%<br>143 kb  |                   |                   |                   |                   |                   |                   |                   |                   |                   |                   |                   |                   |                   |                   |                   |                 |
| 45639308-45664150 |                   |                   |                   | 99.11%<br>25 kb   |                   |                   |                   |                   |                   |                   |                   |                   |                   |                   |                   |                   |                   |                   |                 |
| 45681884-45691620 |                   |                   |                   |                   | 98.24%<br>7 kb    |                   |                   |                   |                   |                   |                   |                   |                   |                   |                   |                   |                   |                   |                 |
| 45691879-45746970 |                   |                   |                   |                   |                   | 99.21%<br>55 kb   |                   |                   |                   |                   |                   |                   |                   |                   |                   |                   |                   |                   |                 |
| 46119380-46154428 |                   |                   |                   |                   |                   |                   | 99.18%<br>35 kb   |                   |                   |                   |                   |                   |                   |                   |                   |                   |                   |                   |                 |
| 46132819-46169013 |                   |                   |                   |                   |                   |                   |                   | 97.99%<br>36 kb   |                   |                   |                   |                   |                   |                   |                   |                   |                   |                   |                 |
| 46594272-46649330 |                   |                   |                   |                   |                   |                   |                   |                   | 96.92%<br>50 kb   |                   |                   |                   |                   |                   |                   |                   |                   |                   |                 |
| 46610007-46634870 |                   |                   |                   |                   |                   |                   |                   |                   |                   | 98.17%<br>25 kb   |                   |                   |                   |                   |                   |                   |                   |                   |                 |
| 47046095-47057242 |                   |                   |                   |                   |                   |                   |                   |                   |                   |                   | 99.31%<br>11 kb   |                   |                   |                   |                   |                   |                   |                   |                 |
| 47173933-47211375 |                   |                   |                   |                   |                   |                   |                   |                   |                   |                   |                   | 97.55%<br>37 kb   |                   |                   |                   |                   |                   |                   |                 |
| 47412484-47575713 |                   |                   |                   |                   |                   |                   |                   |                   |                   |                   |                   |                   | 99.62%<br>163 kb  |                   |                   |                   |                   |                   |                 |
| 47464804-47483311 |                   |                   |                   |                   |                   |                   |                   |                   |                   |                   |                   |                   |                   | 97.83%<br>18 kb   |                   |                   |                   |                   |                 |
| 48505927-48544201 |                   |                   |                   |                   |                   |                   |                   |                   |                   |                   |                   |                   |                   |                   | 99.10%<br>38 kb   |                   |                   |                   |                 |
| 48519352-48558782 |                   |                   |                   |                   |                   |                   |                   |                   |                   |                   |                   |                   |                   |                   |                   | 98.02%<br>39 kb   |                   |                   |                 |
| 48870091-48925479 |                   |                   |                   |                   |                   |                   |                   |                   |                   |                   |                   |                   |                   |                   |                   |                   | 96.92%<br>50 kb   |                   |                 |
| 48886145-48910973 |                   |                   |                   |                   |                   |                   |                   |                   |                   |                   |                   |                   |                   |                   |                   |                   |                   |                   | 98.23%<br>25 kb |
